# Supplementary material for: Integrative analysis prioritised oxytocin-related biomarkers associated with the aetiology of autism spectrum disorder
Source: PubMed Central journal article supplement — eBioMedicine. 2022 Jun 2;81:104091. doi: 10.1016/j.ebiom.2022.104091 (PMC9301877; doi:10.1016/j.ebiom.2022.104091), 2022-06-02
Supplement: mmc1.pdf [file mmc1.pdf]

# Genetic Variations

## SNVs/Indels

## CNVs

### De novo

- 6,511 **ASD probands** (8,175 coding SNVs/Indels)
- 3,391 **unaffected sibling** (3,629 coding SNVs/Indels)

\*From 16 studies of Gene4Denovo

### Rare inherited (quad families)

- 1,786 **ASD probands** (94,418 coding SNVs/Indels)
- 1,786 **unaffected sibling** (93,895 coding SNVs/Indels)

\*From study (PMID:25961944)

### De novo

- 15,581 **ASD probands** (697 *de novo* CNVs)
- 6,017 **unaffected siblings** (212 *de novo* CNVs)

\*From 12 studies of autDB

### Inherited

- 15,581 **ASD probands** (16,205 inherited CNVs)
- 6,017 **unaffected siblings** (11,709 inherited CNVs)

\*From 12 studies of autDB

## 963 OTRGs

(From PubMed, inBio Map, KEGG and Comparative Toxicogenomics database)

## Oxytocin-related genes (OTRGs)

De novo  
SNVs/indels

Rare inherited  
SNVs/indels

De novo CNVs

Inherited CNVs

Burden & correlation analysis → Significant association between rare genetic variations in OTRGs and ASD aetiology

### Combined model

$$\text{Contribution score}_{\text{gene}} = \sum w_t \times (\textit{burden ratio}_t - 1)$$

$t \in (\textit{de novo SNV/Indel, de novo CNV, inherited CNV})$

Integrated with  
Brain expression &  
PPI data

prioritised

458 oxytocin-related  
potential molecular  
biomarkers associated with  
ASD aetiology
