# Supplementary figures and images for: Integrative analysis prioritised oxytocin-related biomarkers associated with the aetiology of autism spectrum disorder
Source: PubMed Central journal article supplement — eBioMedicine. 2022 Jun 2;81:104091. doi: 10.1016/j.ebiom.2022.104091 (PMC9301877; doi:10.1016/j.ebiom.2022.104091), 2022-06-02

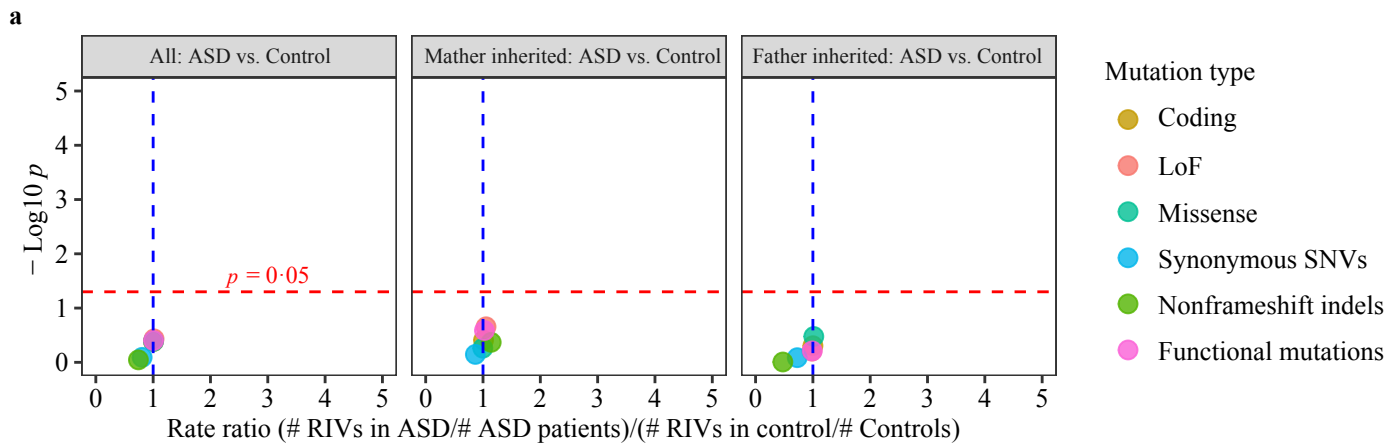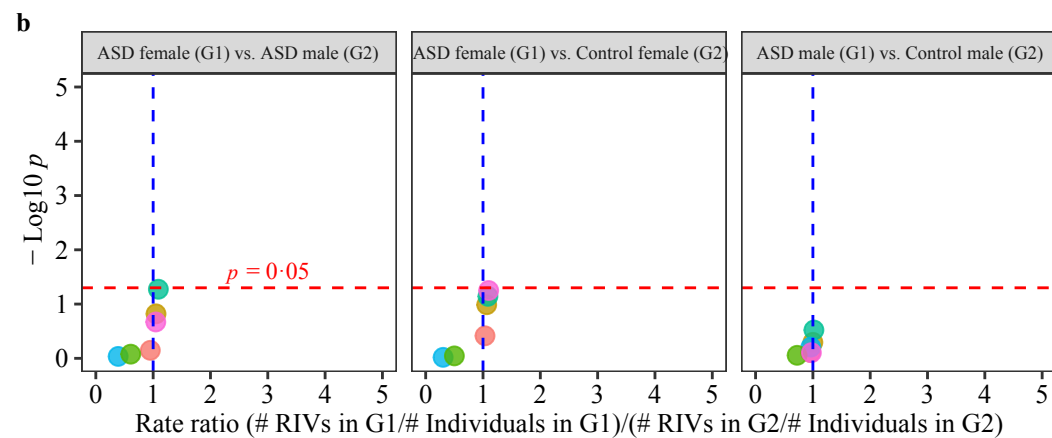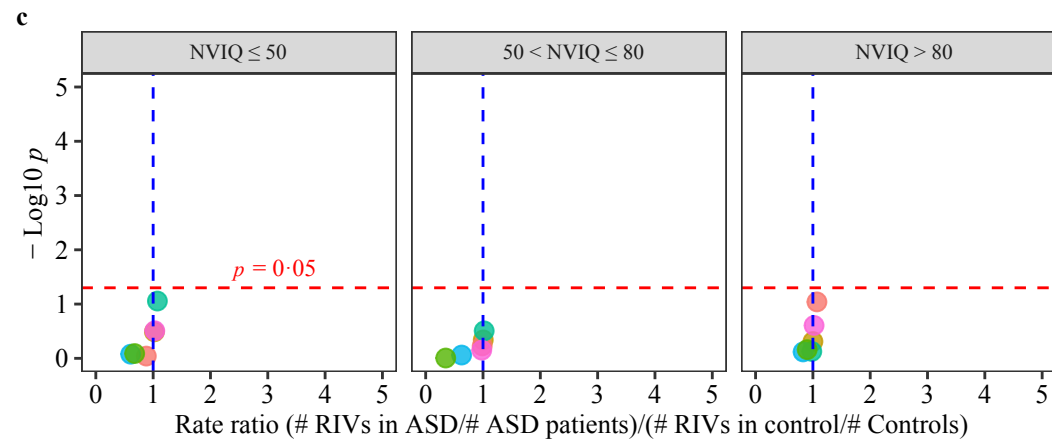

Supplement: mmc2.pdf [file mmc2.pdf]

**a**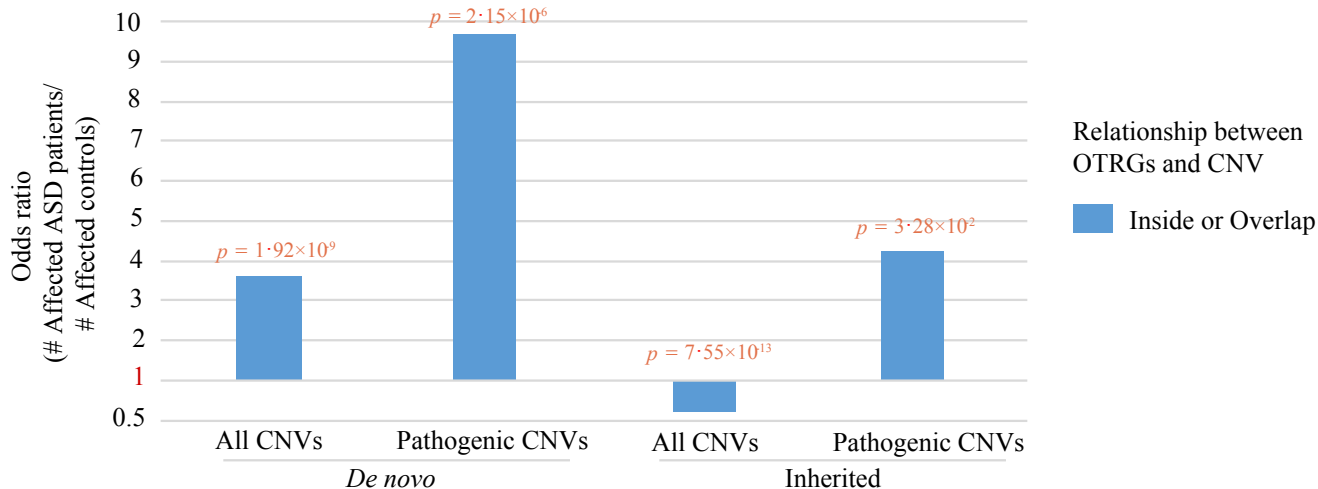**b**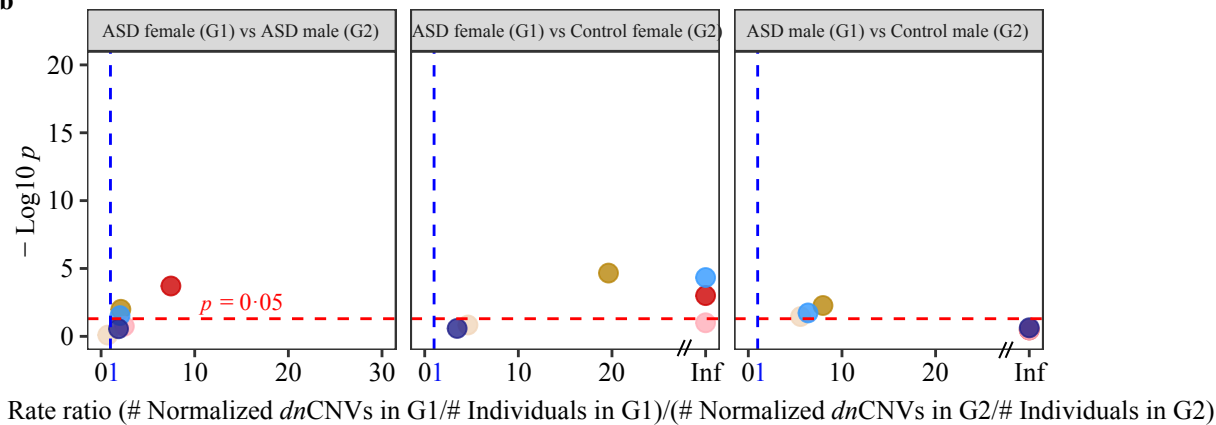**c**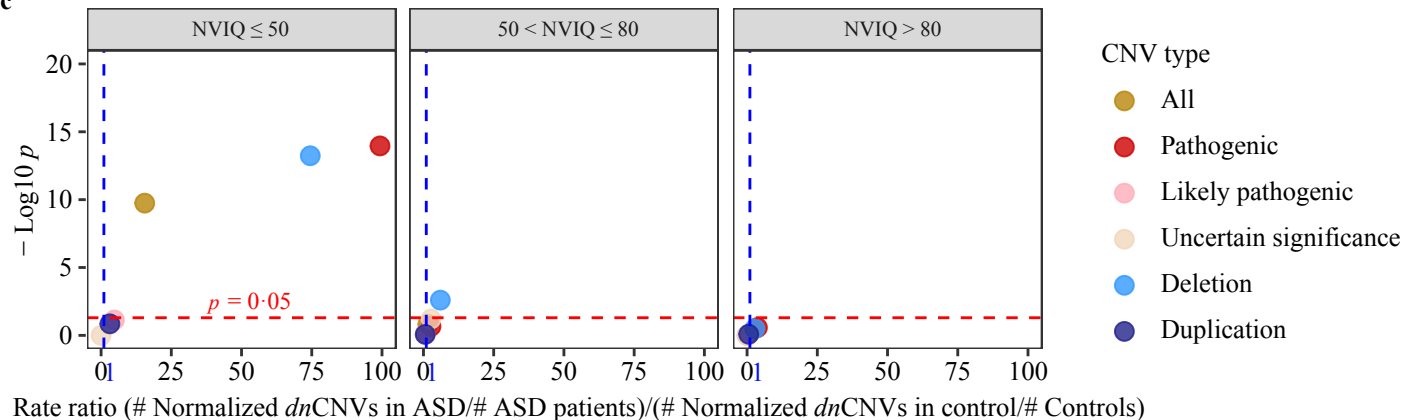

Supplement: mmc3.pdf [file mmc3.pdf]

**a**

Overlap with  
genetic risk factor

$$p = 1.16 \times 10^{-20}$$

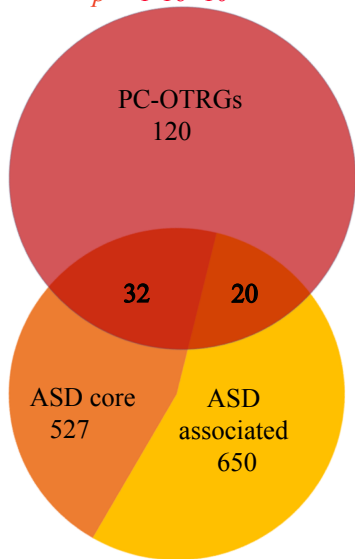**b**

Overlap with  
transcriptomic risk factor

$$p = 9.67 \times 10^{-8}$$

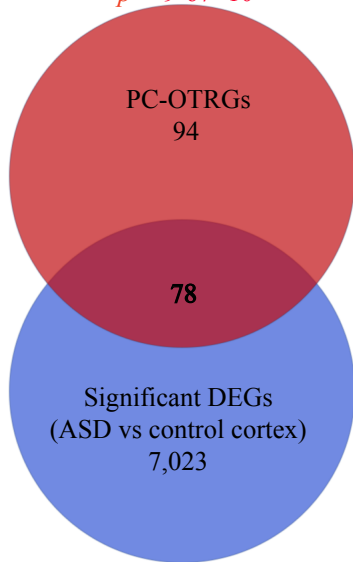

Supplement: mmc4.pdf [file mmc4.pdf]

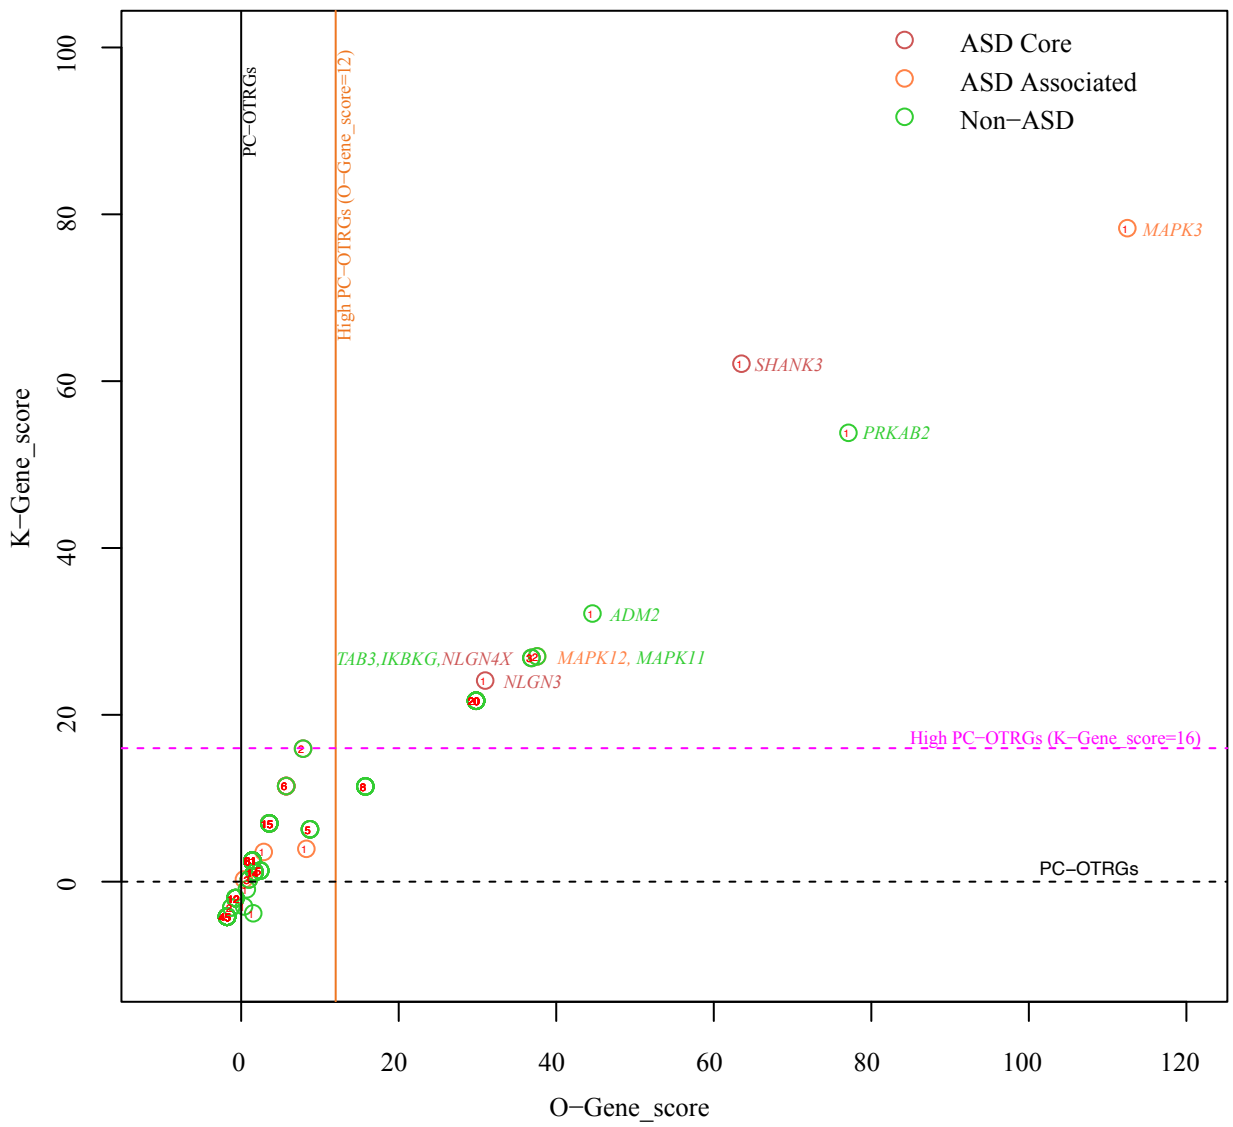

Supplement: mmc5.pdf [file mmc5.pdf]

■ Connection Permutation ■ BrainSpan Permutation ■ PPI Permutation — Observed value

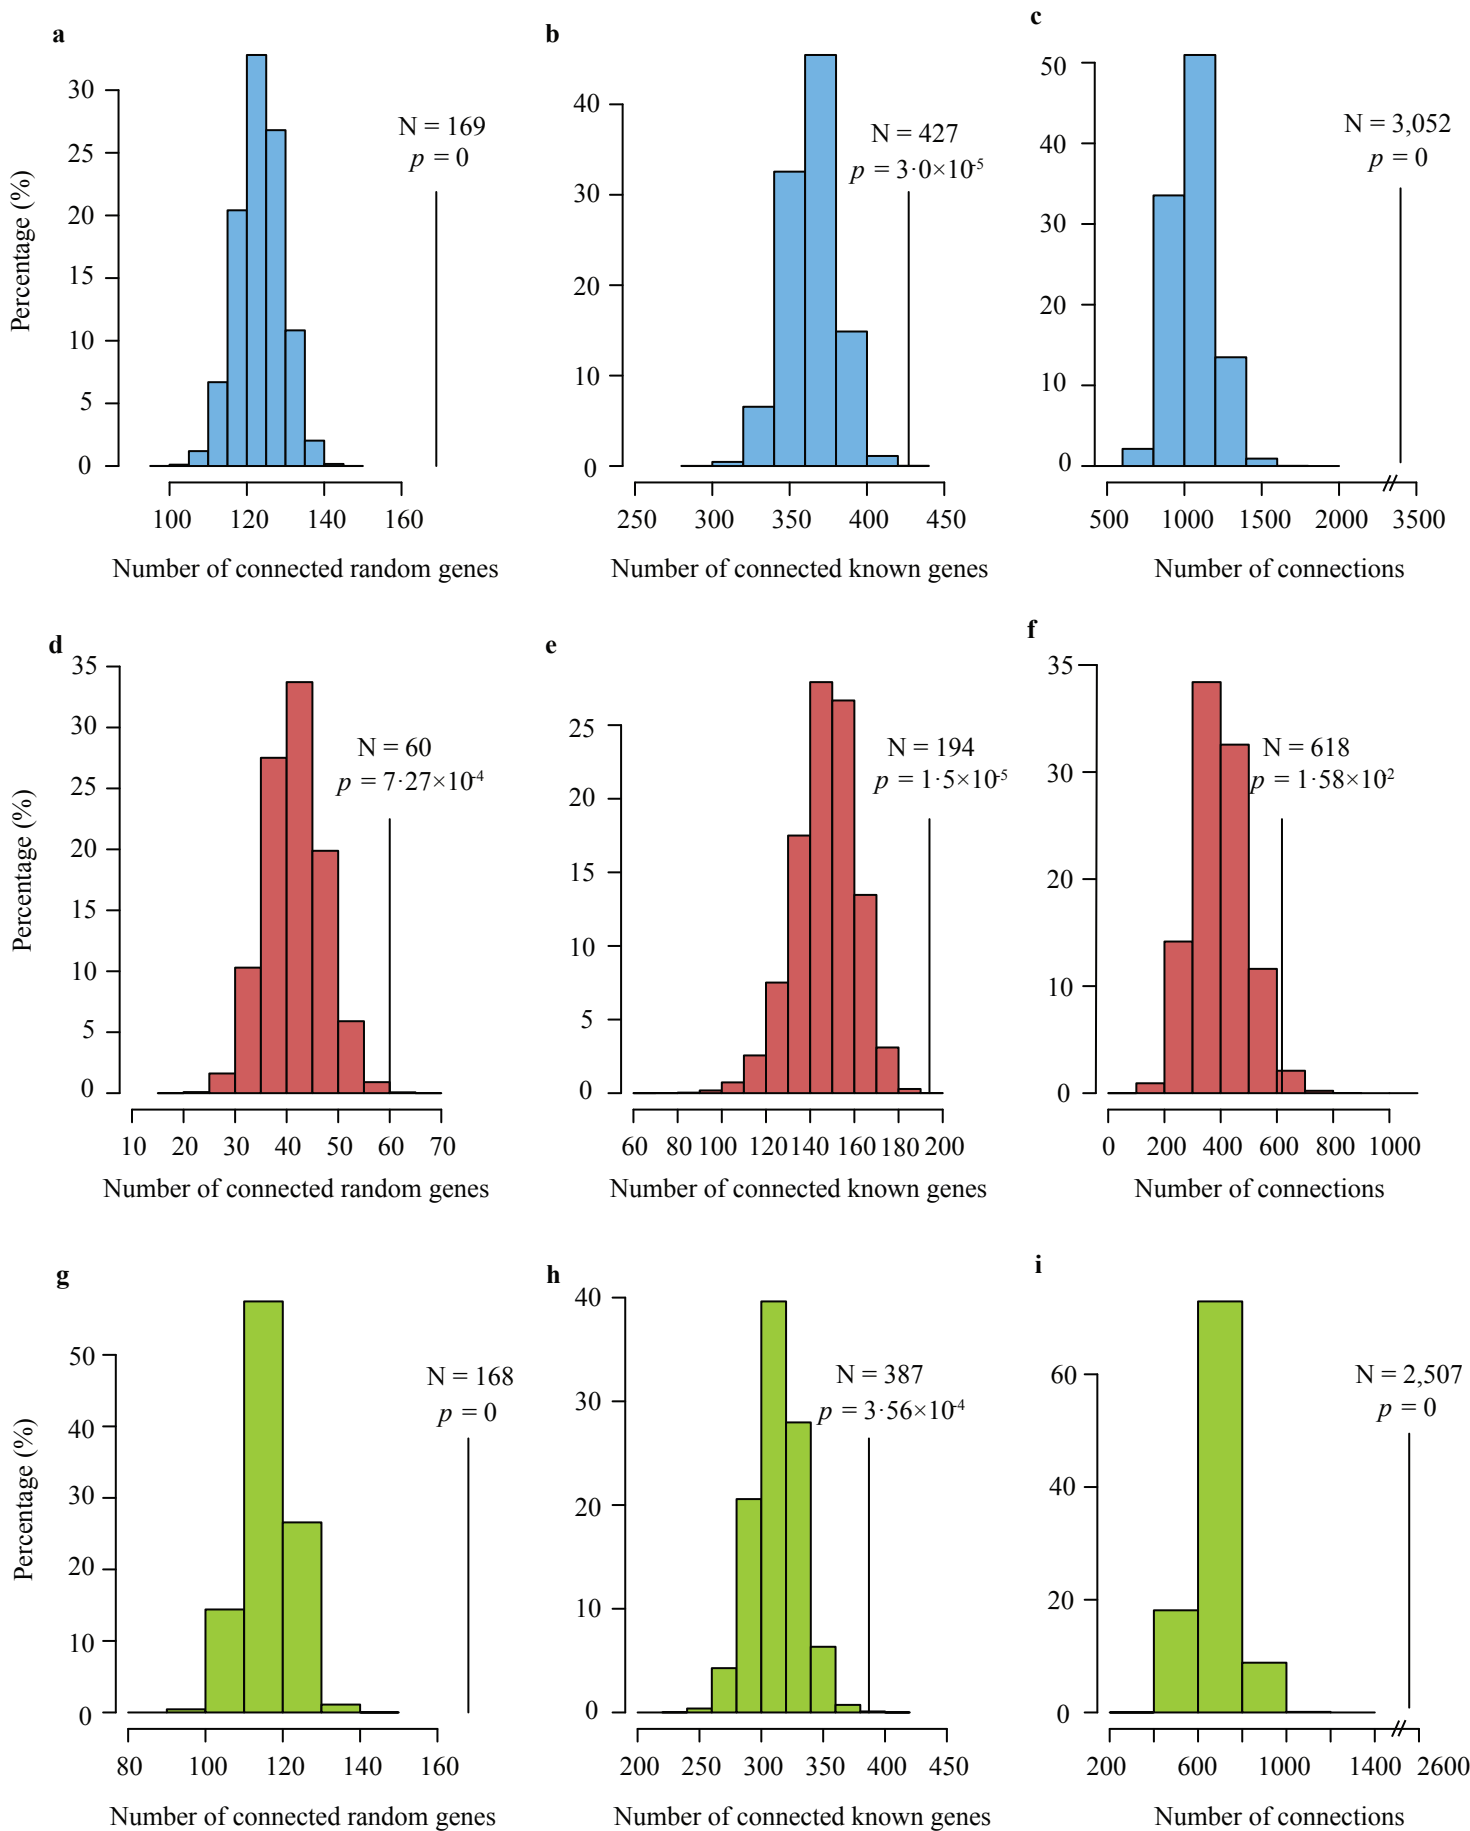

Supplement: mmc6.pdf [file mmc6.pdf]

■ Connection Permutation ■ BrainSpan Permutation ■ PPI Permutation — Observed value

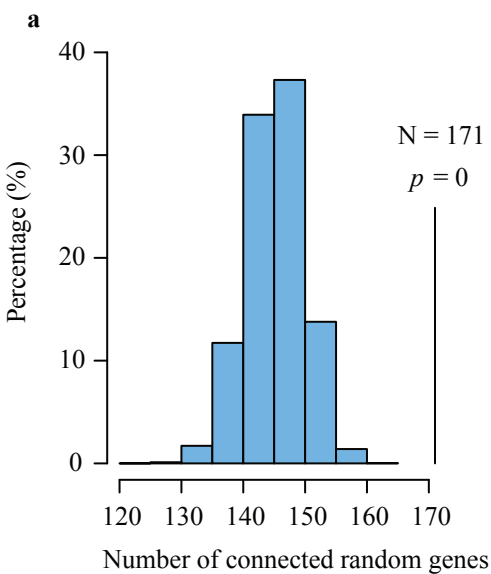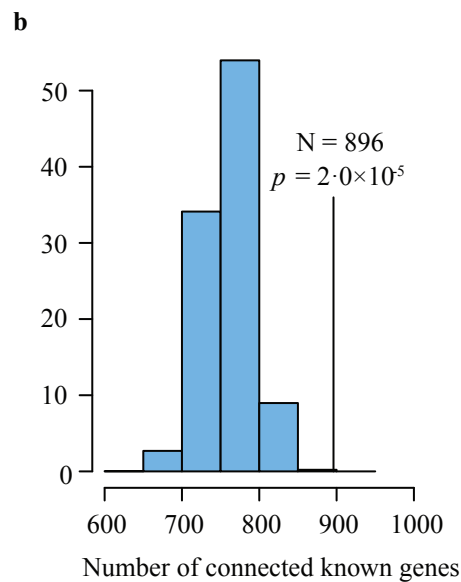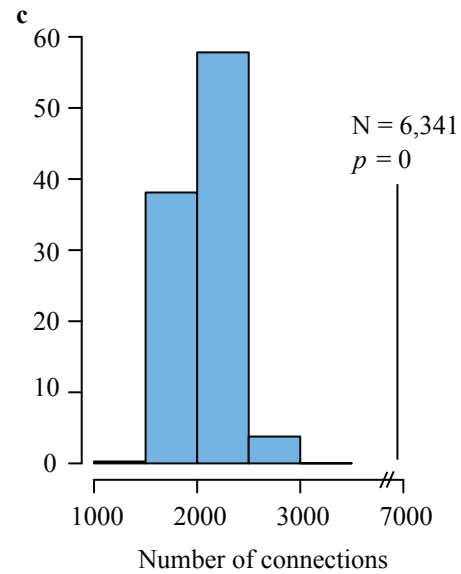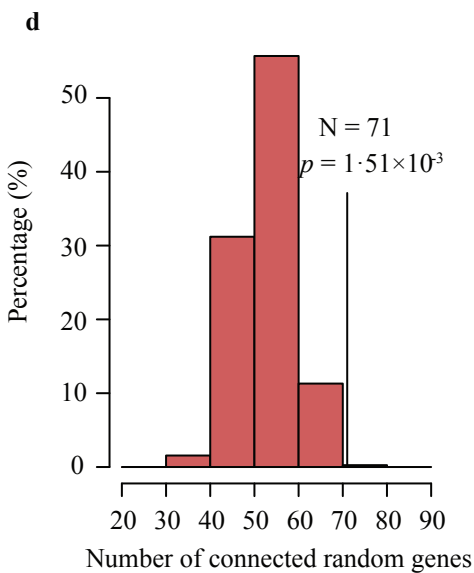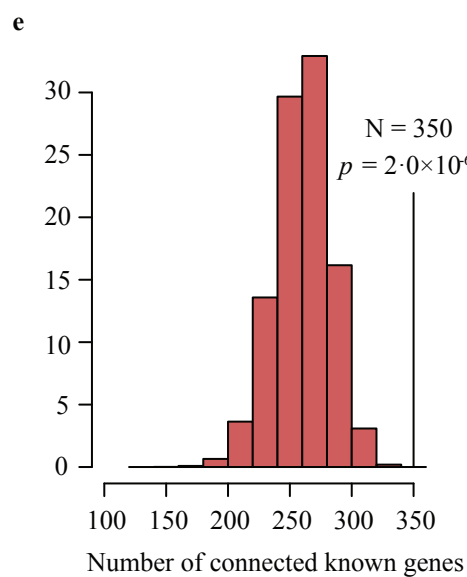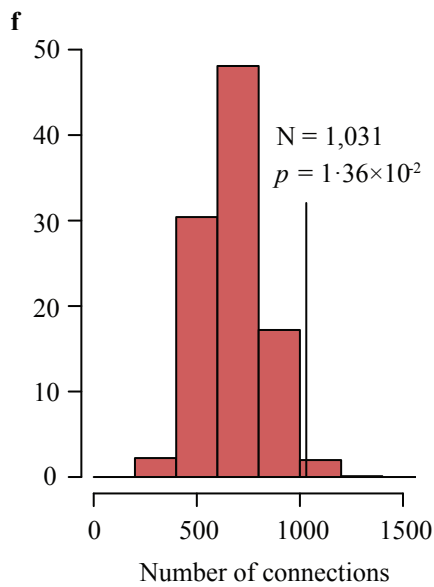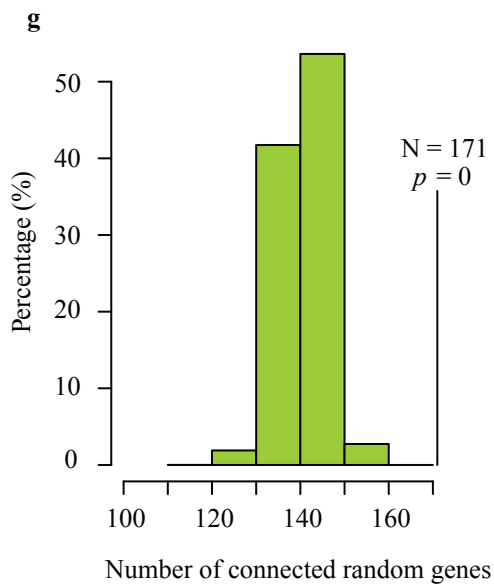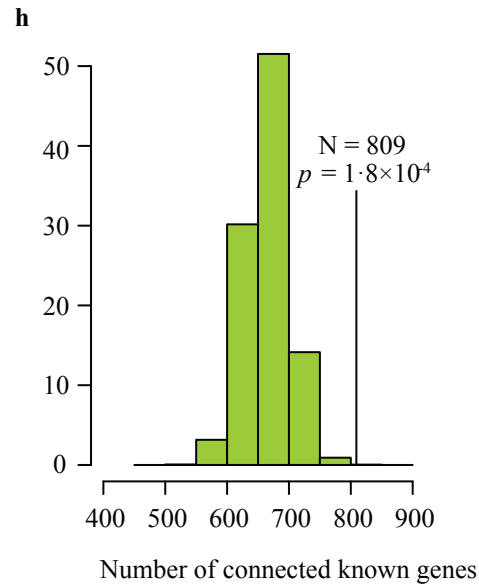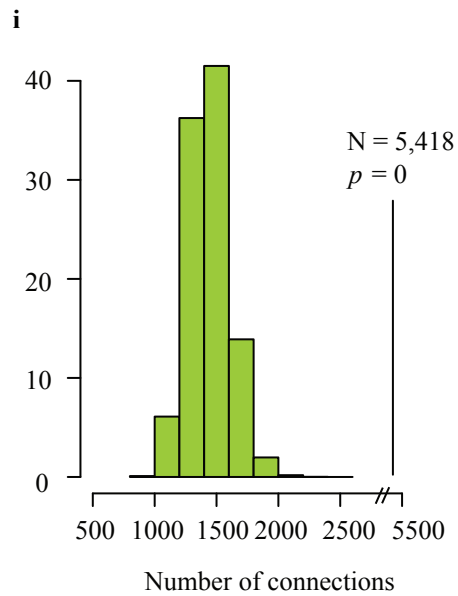

Supplement: mmc7.pdf [file mmc7.pdf]

**a**

Number of affected patients (%)

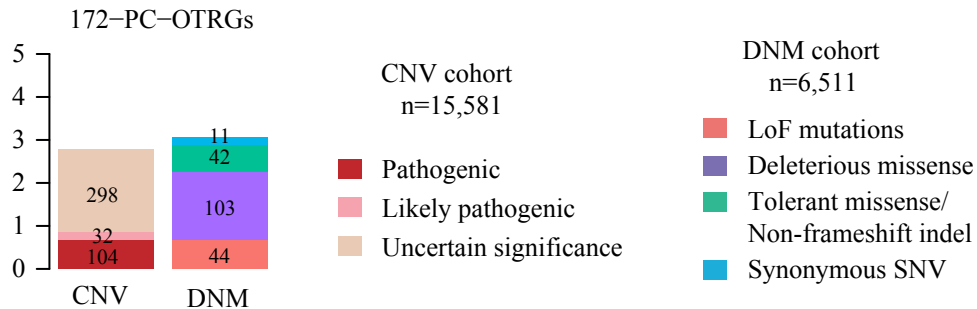**b**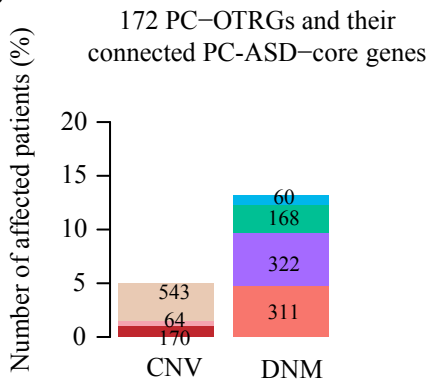**c**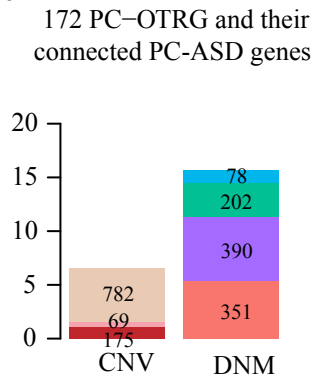

Supplement: mmc8.pdf [file mmc8.pdf]

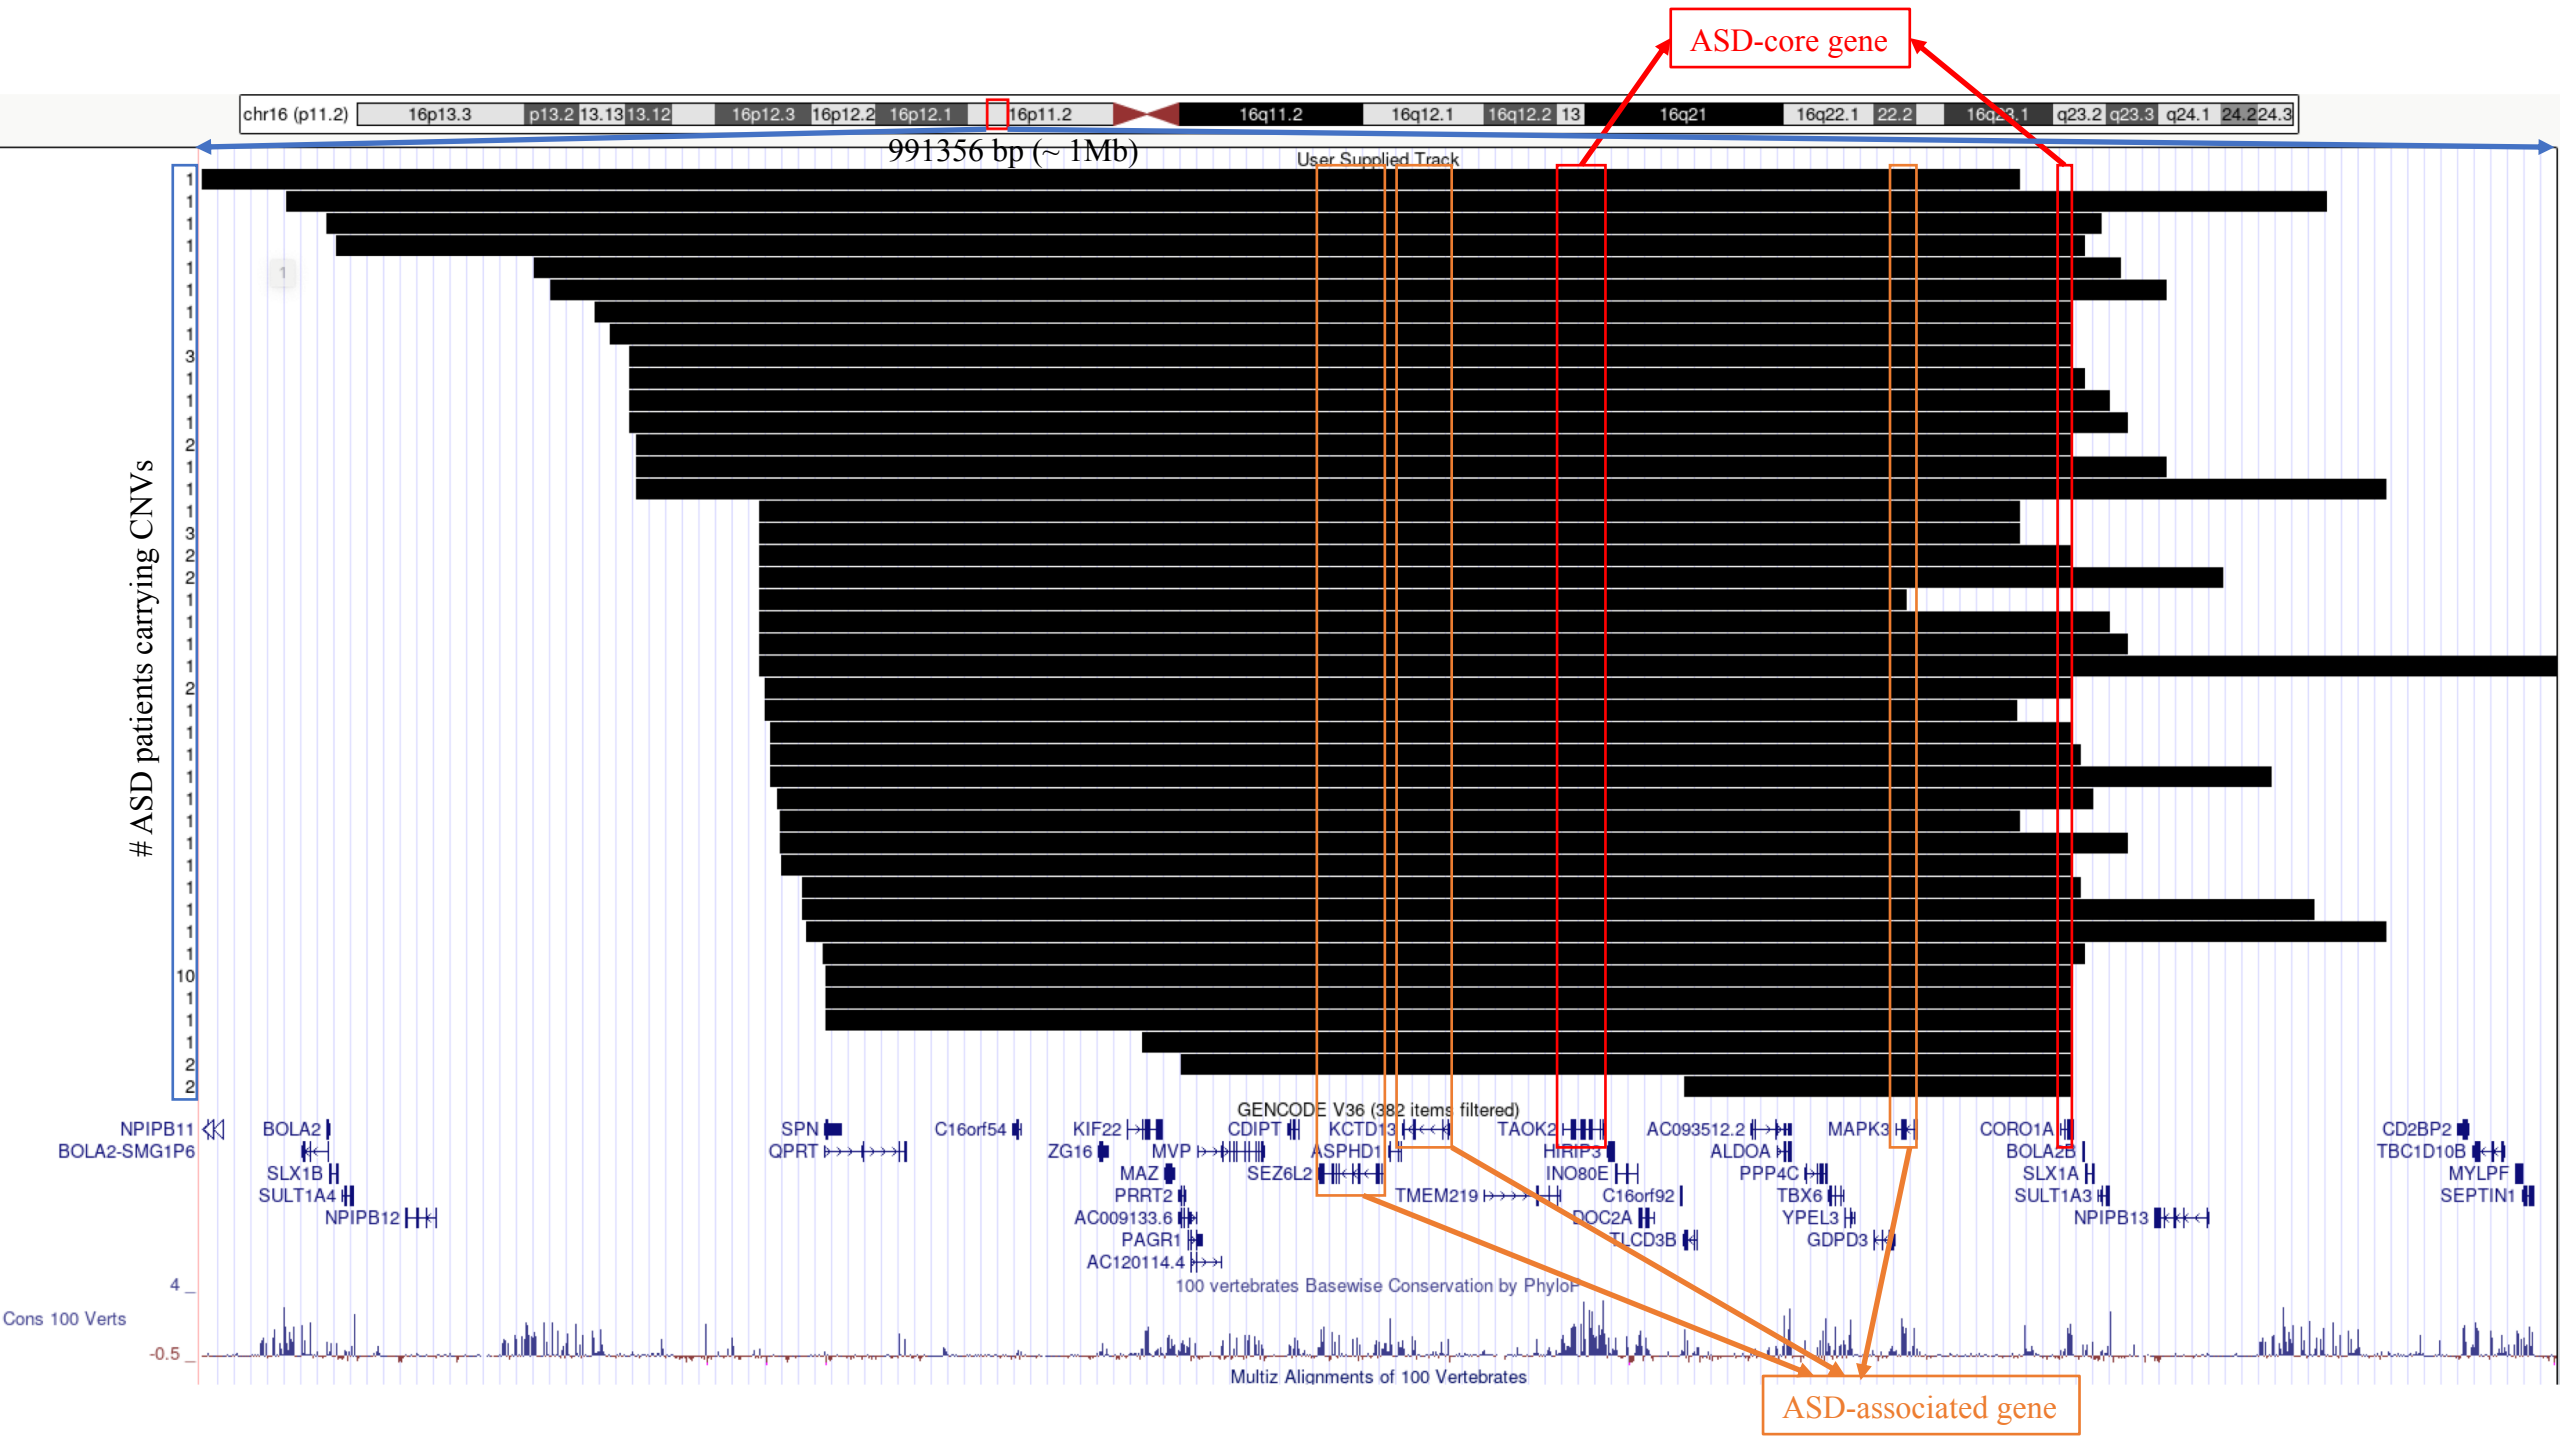

Supplement: mmc9.pdf [file mmc9.pdf]
